# Supplementary material
Source: PubMed Central journal article supplement (PMC4256479)

## Glycoproteins

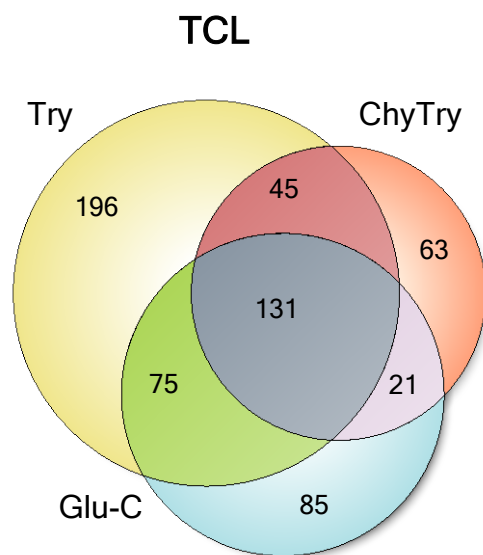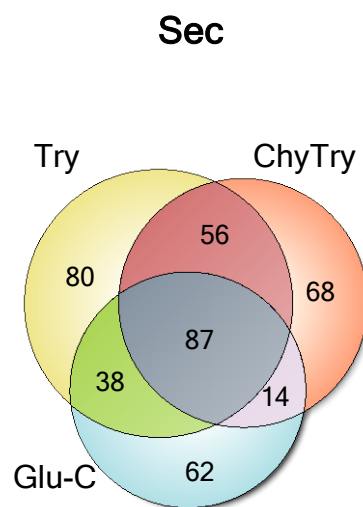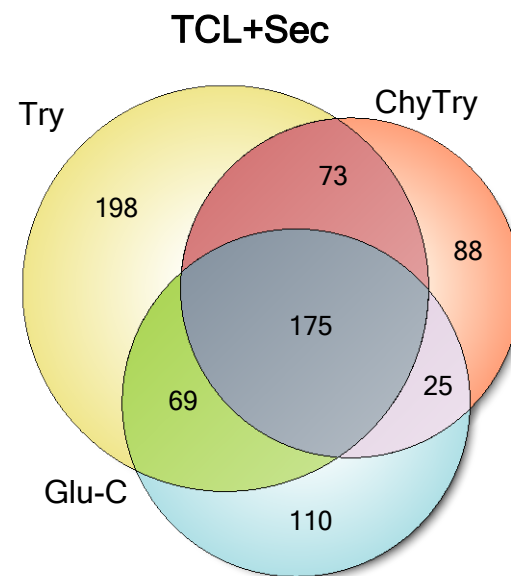

## Glycosites

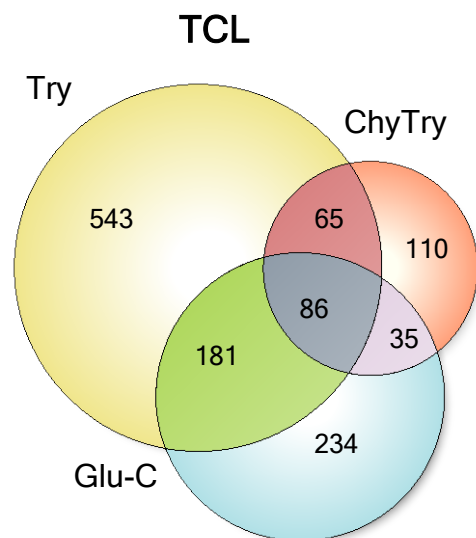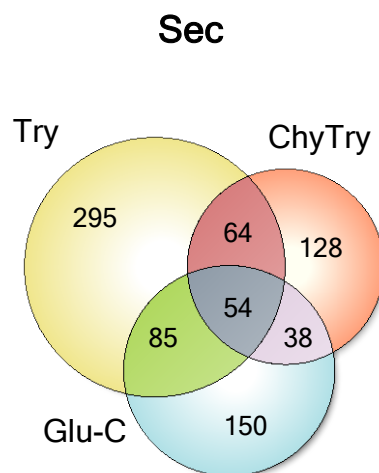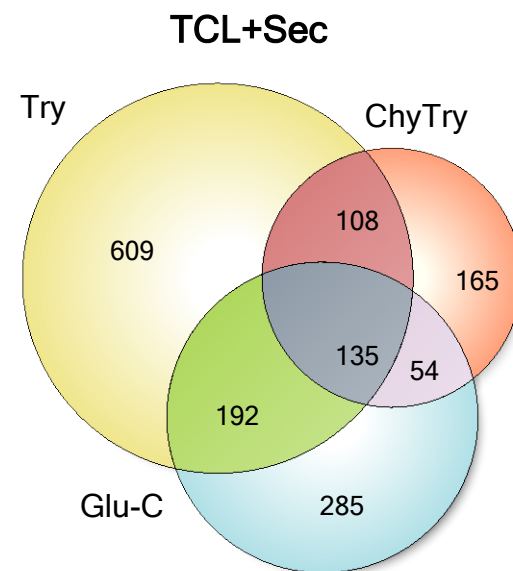

Supplement: supp_M114.041541_mcp.M114.041541-1.pdf [file supp_M114.041541_mcp.M114.041541-1.pdf]
